# Supplementary material
Source: Elsevier journal article supplement (https://www.sciencedirect.com/science/article/pii/S0025775313002662)
Supplement: mmc1 [file S0025775313002662:mmc1.pdf]

## COORDINADORES NACIONALES

|             |                        |          |
|-------------|------------------------|----------|
| José María  | Lobos Bejarano         | Madrid   |
| José Carlos | del Castillo Rodríguez | Canarias |
| Amparo      | Mena González          | Cataluña |

## COORDINADORES AUTONÓMICOS- INVESTIGADORES

|             |                       |                    |
|-------------|-----------------------|--------------------|
| Rafael      | Gómez Navarro         | Aragón             |
| Enrique,    | Martín Rioboó         | Andalucía          |
| Lisardo     | García Matarín,       | Andalucía          |
| Salvador,   | Domínguez Palomo      | Andalucía          |
| Tomás       | Ureña,                | Andalucía          |
| Juan C.     | Rodríguez             | Andalucía          |
| Fernando    | Álvarez Guisasola     | Asturias           |
| Salvador    | Tranche               | Asturias           |
| Tomás       | Rodríguez Ruiz,       | Baleares           |
| J.F.        | Palmer Simó           | Baleares           |
| José Juan   | Alemán Sánchez,       | Canarias           |
| Carmelo     | Jiménez Mena          | Canarias           |
| Mercedes    | Martínez González     | Cantabria          |
| Ignacio     | Párraga               | Castilla La Mancha |
| Luis        | García Ortiz,         | Castilla y León    |
| Javier      | García Norro          | Castilla y León    |
| Mar         | Domingo               | Cataluña           |
| Sonia       | Fuentes               | Cataluña           |
| Antoni      | Planas                | Cataluña           |
| Juan        | Herreros,             | Cataluña           |
| M. Jesús    | Gallardo,             | Cataluña           |
| Enric       | Juncadella            | Cataluña           |
| Tomás       | Vegas Jiménez,        | Extremadura        |
| Luis        | Lozano Mena           | Extremadura        |
| Jacinto     | Mosquera              | Galicia            |
| Rosa        | Rodríguez Álvarez     | Galicia            |
| Luis        | Fransi                | Galicia            |
| Rafael      | Alonso-Roca           | Madrid             |
| Santiago    | Díaz Sánchez          | Madrid             |
| Isabel      | Egocheaga             | Madrid             |
| Natividad   | Puche                 | Madrid             |
| Ángel       | Castellanos Rodríguez | Madrid             |
| Juan Carlos | Obaya                 | Madrid             |
| Luis        | Egido Flores          | Madrid             |
| Javier      | Castellanos           | Madrid             |
| José A.     | Quindimil             | País Vasco         |
| M. Eugenia  | Azpeitia              | País Vasco         |
| Emilio      | Aberasturi            | País Vasco         |
| José Manuel | Pérez Fernández       | Murcia             |
| Juan Carlos | Cenoz                 | Navarra            |
| José Luis   | Olagaray              | La Rioja           |
| Victoria    | Gosalbes              | Valencia           |
| Javier      | Valderrama            | Valencia           |

## INVESTIGADORES

|                            |                       |                    |
|----------------------------|-----------------------|--------------------|
| Ramiro                     | Aguilera Tejero       | Andalucía          |
| Ildefonso                  | Arcenegui Jiménez     | Andalucía          |
| Juan José                  | Bretones Alcaraz      | Andalucía          |
| José Enrique               | Camacho Heras         | Andalucía          |
| M <sup>a</sup> auxiliadora | Espejo                | Andalucía          |
| Juan José                  | Florido Ávila         | Andalucía          |
| Deborah                    | Gil Gómez             | Andalucía          |
| Aurelio                    | Grondona Mayayo       | Andalucía          |
| Norberto                   | Lietor Villajos       | Andalucía          |
| Francisco                  | Mateo Ponce           | Andalucía          |
| Juana                      | Moral Parras          | Andalucía          |
| Leoncio miguel             | Muñoz Sánchez         | Andalucía          |
| Verónica                   | Olmo dorado           | Andalucía          |
| José Ignacio               | Peis redondo          | Andalucía          |
| Joaquín                    | Pla Madrid            | Andalucía          |
| Montserrat                 | Rueda Rojas           | Andalucía          |
| Francisco                  | Vázquez Moreno        | Andalucía          |
| Carmen                     | Galindo Esteban       | Aragón             |
| Matilde                    | Martínez Martínez     | Aragón             |
| Isabel                     | Monreal               | Aragón             |
| Amparo                     | Pérez Berna           | Aragón             |
| Luis                       | Escriche Erviti       | Baleares           |
| Margarita                  | Fornés Homar          | Baleares           |
| Benjamina                  | Hernando Campins      | Baleares           |
| Magdalena                  | Llinás Suau           | Baleares           |
| Juan                       | Pérez                 | Baleares           |
| Teresa                     | Rigo Rullán           | Baleares           |
| Natalia                    | Serrano Gomila        | Baleares           |
| Cristina                   | Soriano Iglesias      | Baleares           |
| Antonio                    | Bernad Ceresuela      | Baleares           |
| Montserrat                 | De la Torre Vidal     | Baleares           |
| Guillermo                  | Bravo de laguna araña | Canarias           |
| Santiago                   | Domínguez Coello      | Canarias           |
| Jesús                      | Domínguez Velázquez   | Canarias           |
| Ana María                  | Galarza Amorrortu     | Canarias           |
| Ángela                     | Gutiérrez Pérez       | Canarias           |
| Ana                        | Hernández Monroy      | Canarias           |
| Oswaldo                    | Lorenzo               | Canarias           |
| Miguel Juan                | Mora García           | Canarias           |
| Emma                       | Navarro Brito         | Canarias           |
| Luis                       | Otero García          | Cantabria          |
| Francisca                  | Gómez Molleda         | Cantabria          |
| Rosa María                 | González Fernández    | Cantabria          |
| Luis                       | Gutiérrez Bardeci     | Cantabria          |
| Luis                       | Otero García          | Cantabria          |
| Oscar                      | Puente Galán          | Cantabria          |
| Candelaria                 | Ayuso Raya            | Castilla La Mancha |
| Jesús                      | Buendía Bermejo       | Castilla La Mancha |
| María José                 | Del campo del campo   | Castilla La Mancha |
| Francisco                  | Escobar Rabadán       | Castilla La Mancha |
| M <sup>a</sup> dolores     | González céspedes     | Castilla La Mancha |
| Miriam                     | Martínez Carretero    | Castilla La Mancha |
| Susana                     | Moreno Cayo           | Castilla La Mancha |
| Adoración                  | Romero Saiz           | Castilla La Mancha |
| Dolores                    | Rutueta García        | Castilla La Mancha |
| Alejandro                  | Villena Ferrer .      | Castilla La Mancha |
| M <sup>a</sup> candelaria  | Ayuso raya            | Castilla La Mancha |
| Alejandro                  | Villena Ferrer        | Castilla La Mancha |
| José Carlos                | Armesto vega          | Castilla y León    |
| Concepción                 | Becerro Muñoz         | Castilla y León    |
| Manuel Ángel               | Gómez marcos          | Castilla y León    |
| Ángel Carlos               | Matía cubillo         | Castilla y León    |

|               |                      |                      |
|---------------|----------------------|----------------------|
| Concepción    | Medina Hernández     | Castilla y León      |
| Paz           | Muriel Díaz          | Castilla y León      |
| Julián        | Velasco Gutiérrez    | Castilla y León      |
| Ana belén     | Escobar oliva.       | Cataluña             |
| Neus          | Soler i Solé.        | Cataluña             |
| M. Carmen     | Calvo Godoy          | Cataluña             |
| Lluís         | Cuixart Costa.       | Cataluña             |
| Nuria         | Curos Bernet         | Cataluña             |
| Mar           | Foix Oña             | Cataluña             |
| Mª del Mar    | Gili Riu.            | Cataluña             |
| Carolina      | Guiriquet Capdevila. | Cataluña             |
| Estefanía     | López Montañez       | Cataluña             |
| María Carmen  | Calvo Godoy          | Cataluña             |
| Carmen        | Ciria                | Cataluña             |
| Maite         | Coll Perona          | Cataluña             |
| Elena         | De Frutos Echaniz    | Cataluña             |
| Belén         | Enfedaque Montes     | Cataluña             |
| María Del Mar | Gili Riu             | Cataluña             |
| Carles        | Guardiola Parellada  | Cataluña             |
| Mercedes      | Jiménez González     | Cataluña             |
| Judit         | Llussà Arboix        | Cataluña             |
| Gemma         | Lorenz Castañé       | Cataluña             |
| José Luis     | Morera Serra         | Cataluña             |
| Teresa        | Oromi Solsona        | Cataluña             |
| Mercedes      | Retana Puigmartí     | Cataluña             |
| Antonio       | Rodríguez Rosich .   | Cataluña             |
| Marta         | Roset Bartoli        | Cataluña             |
| Mª Ángeles    | Salvador Milian      | Cataluña             |
| Cristina      | Sánchez              | Cataluña             |
| Oscar         | Santisteban.         | Cataluña             |
| Silvia        | Sola Muñoz           | Cataluña             |
| Prisclia      | Trujillo Suarez      | Cataluña             |
| Asunción      | Wilke Trinxat        | Cataluña             |
| Tarsicio      | Forcen               | CF Navarra           |
| Mª José       | Ariz Arnedo          | CF Navarra           |
| Antonio       | Brugos               | CF Navarra           |
| Pilar         | Buil                 | CF Navarra           |
| Javier        | Diez Espino          | CF Navarra           |
| Cristina      | Fernández            | CF Navarra           |
| Mª José       | Guruchaga            | CF Navarra           |
| Mª Rosario    | Izco Salinas         | CF Navarra           |
| Francisco     | Javier Prim          | CF Navarra           |
| Yolanda       | Martínez             | CF Navarra           |
| Felipe        | Salzar               | CF Navarra           |
| Leonardo      | Ezpeleta Albuixech   | Comunidad Valenciana |
| Amparo        | Garica Royo          | Comunidad Valenciana |
| Rogelio       | Monfort              | Comunidad Valenciana |
| Alvaro        | Bonet                | Comunidad Valenciana |
| Pilar         | Botija               | Comunidad Valenciana |
| Rogelio       | Monfort              | Comunidad Valenciana |
| Mireya        | Colomer Lloret       | Comunidad Valenciana |
| Antonio       | Lorenzo Piqueres     | Comunidad Valenciana |
| Paloma        | Ramos Ruiz           | Comunidad Valenciana |
| Pilar         | Pascual Montero      | Extremadura          |
| Elena         | Balanzategui         | Extremadura          |
| Juan José     | Dorado Martín        | Extremadura          |
| María Dolores | López Crespo         | Extremadura          |
| Manuel        | Martínez             | Extremadura          |
| Consuelo      | Vilaplana García     | Extremadura          |
| Rosario       | Aguado Martín        | Galicia              |
| María Isabel  | Pita                 | Galicia              |
| María Jesús   | Freiría Tato         | Galicia              |
| Jesús Manuel  | Novo Rodríguez       | Galicia              |
| Mercedes      | Soto                 | Galicia              |

|                      |                                |                   |
|----------------------|--------------------------------|-------------------|
| Manuel               | Domínguez Sardiña              | Galicia           |
| Carlos               | Eirea                          | Galicia           |
| Francisco Javier     | García Soidán                  | Galicia           |
| Manuel               | González Rodríguez             | Galicia           |
| Jesús M <sup>a</sup> | Martínez Barrios               | Galicia           |
| Olvido               | Latorre Rodríguez              | Madrid            |
| Manuel Antonio       | Alonso Pérez                   | Madrid            |
| Miguel Ángel         | Álvaro Sánchez                 | Madrid            |
| Sara                 | Artola Menéndez                | Madrid            |
| Lourdes              | Barutell Rubio                 | Madrid            |
| Esperanza            | Calvo García                   | Madrid            |
| Luis                 | Carrascal García               | Madrid            |
| Carmen María         | Cervantes Guijarro             | Madrid            |
| Ricardo              | De Felipe Medina               | Madrid            |
| Dolores              | De La Fuente Arriarán          | Madrid            |
| María José           | García Sacristán               | Madrid            |
| Irene                | García-Heras Carretero         | Madrid            |
| Dolores              | Garrudo Benito                 | Madrid            |
| Teresa               | Gijón Conde                    | Madrid            |
| Manuel               | Gómez García                   | Madrid            |
| José María           | Gómez Ocaña                    | Madrid            |
| Esteban              | González López                 | Madrid            |
| Jose Antonio         | González Posada                | Madrid            |
| Susana               | González Rodríguez             | Madrid            |
| Francisco Javier     | Gordillo López                 | Madrid            |
| Paz                  | Hidalgo Vera                   | Madrid            |
| Liliana              | Losada Cucco                   | Madrid            |
| Aranzazu             | Luaces Gayan                   | Madrid            |
| Pilar                | Lurueña Lobo                   | Madrid            |
| Luis Enrique         | Morales Cobos                  | Madrid            |
| Juan Carlos          | Moreno Fernández               | Madrid            |
| Vicente              | Palomo Sanz                    | Madrid            |
| Isabel               | Rodríguez-Miñón Otero          | Madrid            |
| Antonio              | Ruiz García                    | Madrid            |
| Isabel               | Sáenz Del Castillo             | Madrid            |
| Jeannet Dolores      | Sánchez Yépez                  | Madrid            |
| Iliana               | Serrano Flores                 | Madrid            |
| Ainhoa               | Sevilla Aguerrea               | Madrid            |
| Rebecca              | Ordovás Ainscough              | Madrid            |
| Miguel Angel         | Gómez Saez                     | País Vasco        |
| Pedro                | Gondra Cirarda                 | País Vasco        |
| Luis                 | Laborda González               | País Vasco        |
| Emilio               | Aberasturi Ramirez             | País Vasco        |
| M <sup>a</sup> Luisa | Ruiz Macho                     | País Vasco        |
| Iciar                | Allende Pérez                  | País Vasco        |
| Antxon               | Apiñaniz Fernández De Larrinoa | País Vasco        |
| Julián               | Bajo García                    | País Vasco        |
| Pablo                | Daza Asumendi                  | País Vasco        |
| Naroa                | Pampin                         | País Vasco        |
| Carmen               | Rodríguez Curras               | País Vasco        |
| Fernando             | Uribe Oyarbide                 | País Vasco        |
| José Félix           | Zuazagoitia Nubla              | País Vasco        |
| Alberto              | Cabal García                   | Ppdo. de Asturias |
| José María           | Fernández Rodríguez-Lacin      | Ppdo. de Asturias |
| Milagros             | Gómez De Los Bueis             | Ppdo. de Asturias |
| Tomás                | Gutiérrez Renedo               | Ppdo. de Asturias |
| Eduardo              | Hevia Rodríguez                | Ppdo. de Asturias |
| Ramón                | Macía Pérez                    | Ppdo. de Asturias |
| María Jesús          | Pandiella Suarez               | Ppdo. de Asturias |
| Rubén                | Villa Estébanez                | Ppdo. de Asturias |
| José Luis            | Torres Baile                   | Rioja (La)        |
| Juan José            | Gomáriz García                 | Región de Murcia  |
| Juan De Dios         | González Caballero             | Región de Murcia  |
| Andrés               | Linares Pardo                  | Región de Murcia  |
| M <sup>a</sup> Elena | Sebastián Delgado              | Región de Murcia  |
